# Supplementary material for: Intra-Host Evolution Analyses in an Immunosuppressed Patient Supports SARS-CoV-2 Viral Reservoir Hypothesis
Source: MDPI journal article supplement (doi:10.3390/v16030342), 2024-02-23
Supplement: s1 [file s1]

## Supplementary Material

Table S1. Description of analyzed samples

| ID            | Date       | Days since symptom onset (DSO) | Tissue              |
|---------------|------------|--------------------------------|---------------------|
| L00409639001  | 08/01/2021 | 1                              | Nasopharyngeal swab |
| L00350036001A | 28/04/2021 | 111                            | Nasopharyngeal swab |
| L00350839     | 03/05/2021 | 116                            | Nasopharyngeal swab |
| L00363495001  | 28/06/2021 | 172                            | Nasopharyngeal swab |

Table S2. Plasma binding and Fc-effector functions of analyzed samples.

| Sample           | Plasma binding (FACS, normalized to CV3-25) |                       | ADCC (%)    |
|------------------|---------------------------------------------|-----------------------|-------------|
|                  | D614G                                       | B.1.160 (S477N+D614G) | D614G       |
| 5/5/2021 (D118)  | 10,407                                      | 19,819                | 12,11750306 |
| 6/5/2021 (D119)  | 12,367                                      | 19,540                | 20,93023256 |
| 10/5/2021 (D123) | 7,950                                       | 12,850                | 25,33659731 |
| Threshold        | 0,985                                       | 0,057                 | 7,180742554 |



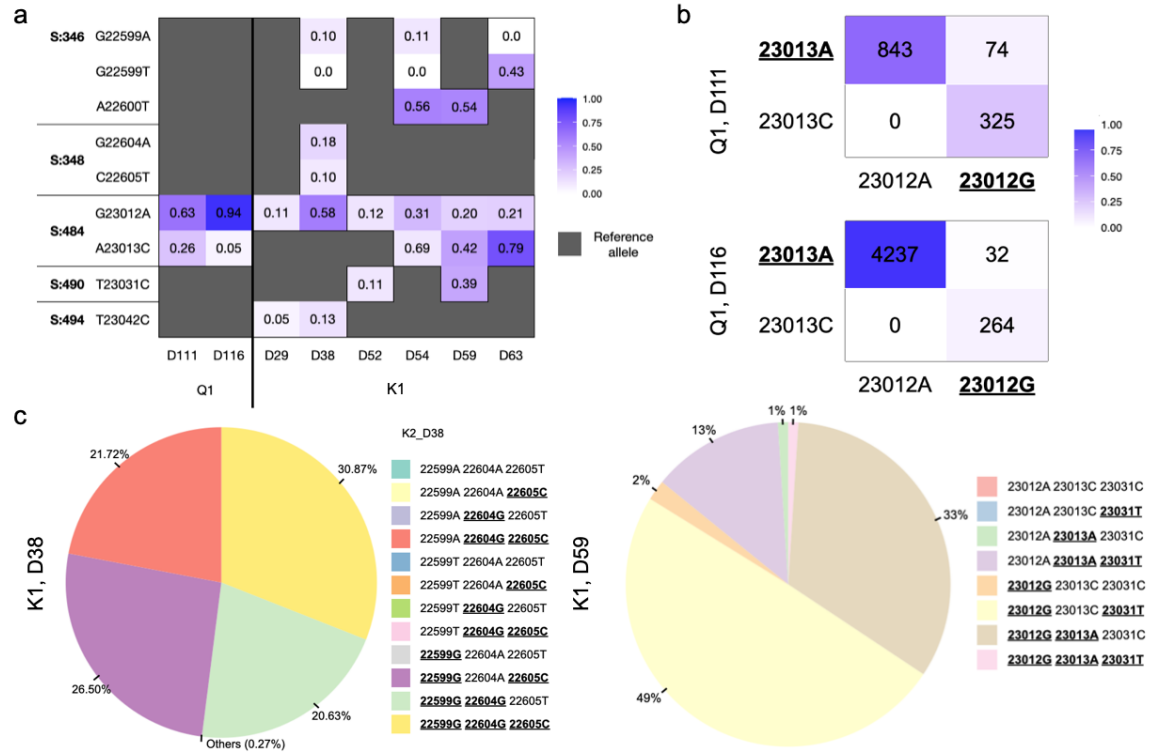

**Figure S1. Intra-host allelic frequencies for mutated positions in the S's RBD.**

**a:** frequencies for the alternative allele per position for mutated positions at S:346, S:348, S:484, S:490, and S:494 in the patient described in this study and Lee et al.'s P2 (10). **b:** frequencies of the haplotypes present at codon S:484 on D111 and D116 for our patient. Reference alleles are underlined. **c:** Left - frequencies of the haplotypes present at codons S:346 and S:348 on D38 for P2 on reads encompassing all three positions. "Others" category includes 22599A/22604G/22605T, 22599G/22604A/22605T, and 22599T/22604G/22605C combinations (0.1%, 0.07%, 0.1%, respectively). Right - frequencies for the haplotypes present at codons S:484 and S:490 on D59 for P2 on reads containing all three positions.
